# Supplementary material for: Social Norms Change and Tobacco Use: A Protocol for a Systematic Review and Meta-Analysis of Interventions
Source: Int J Environ Res Public Health. 2021 Nov 20;18(22):12186. doi: 10.3390/ijerph182212186 (PMC8618876; doi:10.3390/ijerph182212186)
Supplement: Supplementary file 1 [file ijerph-18-12186-s001.zip › Supplementary File S2.pdf]

## Supplementary File S2 – Complete Search for PubMed

First, I used the following term groups to create five separate entries.

1. cig\* OR tobacco OR smok\* OR dip OR water pipe OR hookah OR shisha OR bidi OR tobacco prevalence OR smoking prevalence OR ends OR vap\* OR heat-not-burn OR iqos

2. norm OR social influenc\* OR peer influenc\* OR famil\* influenc\* OR friend influenc\* OR approv\*

3. random\* OR trial OR experiment OR "nonequivalent groups" OR "cohort study" OR longitudinal OR prospective OR retrospective OR "propensity score matching" OR "regression discontinuity" OR "difference-in-difference" OR "double difference" OR "instrumental variables" OR "time series" OR case-control OR quasi-experiment\* OR pre-post OR case-cohort OR evaluation

4. mhealth OR digital OR "text messag\* " OR nrt OR medic\* OR media OR campaign\* OR policy OR tax\* OR law OR intervention OR counsel\* OR peer OR group OR sms OR game\* OR monetary OR incentiv\* OR educat\*

5. "systematic review" OR "scoping review" OR "rapid review" OR "cross-sectional" OR protocol

I then combined them all using Boolean operators to yield the complete search for PubMed (next page):

((((((((norm[Title/Abstract]) OR (social influenc\*[Title/Abstract])) OR (peer  
influenc\*[Title/Abstract])) OR (famil\* influenc\*[Title/Abstract])) OR (friend  
influenc\*[Title/Abstract])) OR (approv\*[Title/Abstract])) AND (((((((((((cig\*[Title/Abstract])  
OR (tobacco[Title/Abstract])) OR (smok\*[Title/Abstract])) OR (dip[Title/Abstract])) OR (water  
pipe[Title/Abstract])) OR (hookah[Title/Abstract])) OR (shisha[Title/Abstract])) OR  
(bidi[Title/Abstract])) OR (tobacco prevalence[Title/Abstract])) OR (smoking  
prevalence[Title/Abstract])) OR (ENDS[Title/Abstract])) OR (vap\*[Title/Abstract])) OR (heat-  
not-burn[Title/Abstract])) OR (iqos[Title/Abstract])) AND  
((((((((((((((((random\*[Title/Abstract]) OR (trial[Title/Abstract])) OR  
(experiment[Title/Abstract])) OR (nonequivalent groups[Title/Abstract])) OR (cohort  
study[Title/Abstract])) OR (longitudinal[Title/Abstract])) OR (prospective[Title/Abstract])) OR  
(retrospective[Title/Abstract])) OR (propensity score matching[Title/Abstract])) OR (regression  
discontinuity[Title/Abstract])) OR (difference-in-difference[Title/Abstract])) OR (double  
difference[Title/Abstract])) OR (instrumental variables[Title/Abstract])) OR (time  
series[Title/Abstract])) OR (case-control[Title/Abstract])) OR (quasi-  
experiment\*[Title/Abstract])) OR (pre-post[Title/Abstract])) OR (case-cohort[Title/Abstract]))  
OR (evaluation[Title/Abstract])) AND (((((((((((((((mhealth[Title/Abstract]) OR  
(digital[Title/Abstract])) OR (text messag\*[Title/Abstract])) OR (NRT[Title/Abstract])) OR  
(medic\*[Title/Abstract])) OR (media[Title/Abstract])) OR (campaign\*[Title/Abstract])) OR  
(policy[Title/Abstract])) OR (tax\*[Title/Abstract])) OR (law[Title/Abstract])) OR  
(intervention[Title/Abstract])) OR (counsel\*[Title/Abstract])) OR (peer[Title/Abstract])) OR  
(group[Title/Abstract])) OR (sms[Title/Abstract])) OR (game\*[Title/Abstract])) OR  
(monetary[Title/Abstract])) OR (incentiv\*[Title/Abstract])) OR (educat\*[Title/Abstract])) NOT  
((((systematic review[Title/Abstract]) OR (scoping review[Title/Abstract])) OR (rapid  
review[Title/Abstract])) OR (cross-sectional[Title/Abstract])) OR (protocol[Title/Abstract]))
